# Supplementary material for: Design and gelation behaviors of cholesterol-based derivatives as organogelators: an investigation of the correlation between molecular structures and gelation behaviors
Source: Royal Society of Chemistry journal article supplement (doi:10.1039/c8nj02899k), 2019-01-01
Supplement: c8nj02899k1.pdf [file c8nj02899k1.pdf]

# Electronic Supplementary Information for

**Design and gelation behaviors of cholesterol-based derivatives as  
organogelators: An investigation of the correlation between  
molecular structures and gelation behaviors**

Hai-Kuan Yang\*, Xiao-Min Wang, Lin-Lin Liu, Han-Xu Shi

*Department of Chemistry, School of Science, North University of China, Taiyuan*

*030051, Shanxi, China. E-mail: haikuanyang@nuc.edu.cn*

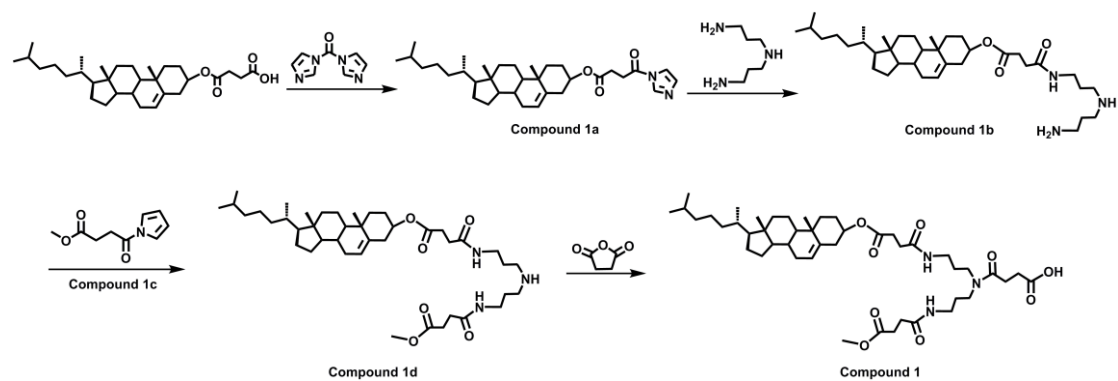

**Figure S1.** Synthetic route of compound 1.

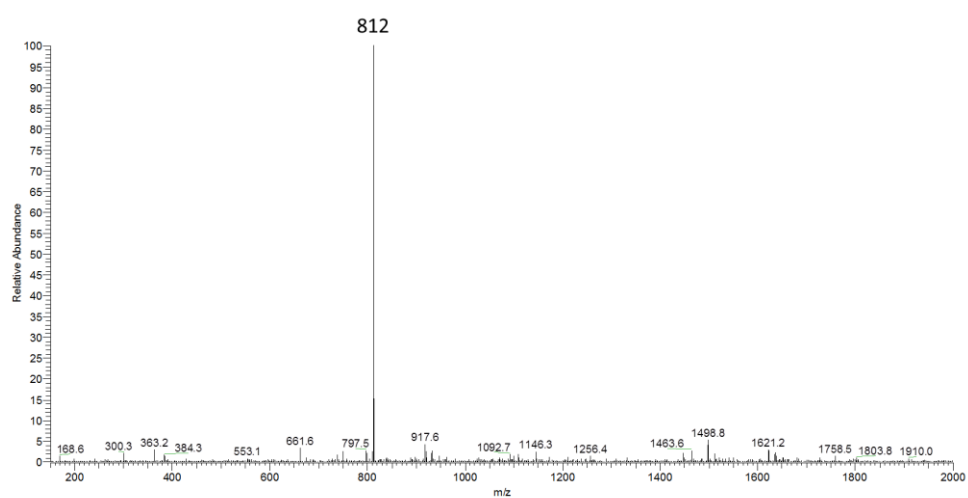

**Figure S2.** ESI-MS spectrum of compound 1.  $[\text{M}-\text{H}]^-$ :  $812 \text{ g mol}^{-1}$ .

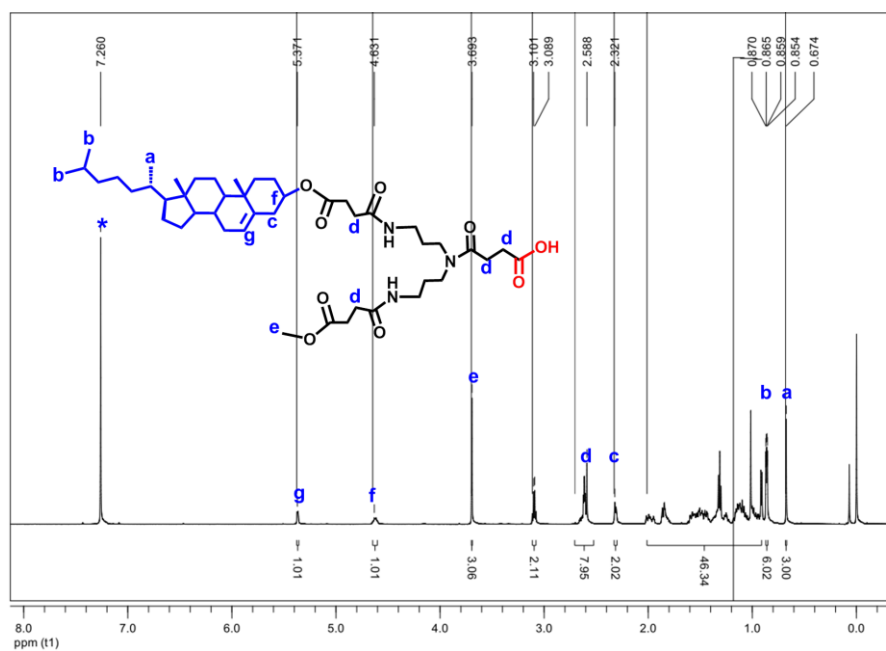

**Figure S3.**  $^1\text{H}$  NMR spectrum of compound 1 in  $\text{CDCl}_3$ .

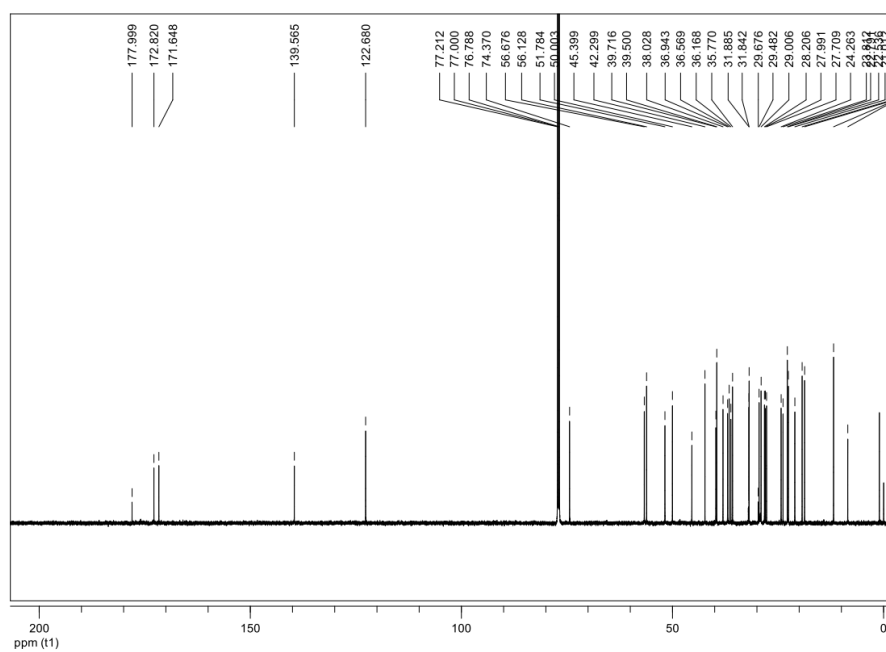

**Figure S4.**  $^{13}\text{C}$  NMR spectrum of compound 1 in  $\text{CDCl}_3$ .

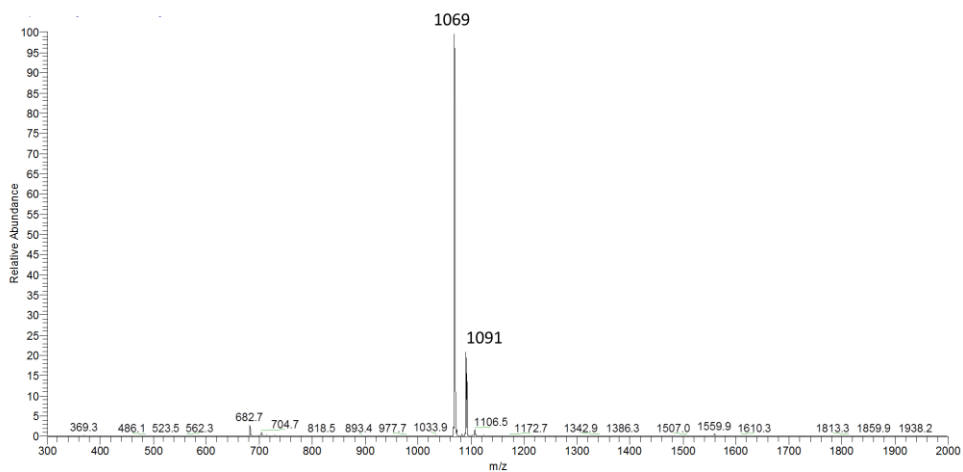

**Figure S5.** ESI-MS spectrum of compound 2.  $[M+H]^+$ :  $1069 \text{ g mol}^{-1}$ ,  $[M+Na]^+$ :  $1091 \text{ g mol}^{-1}$ .

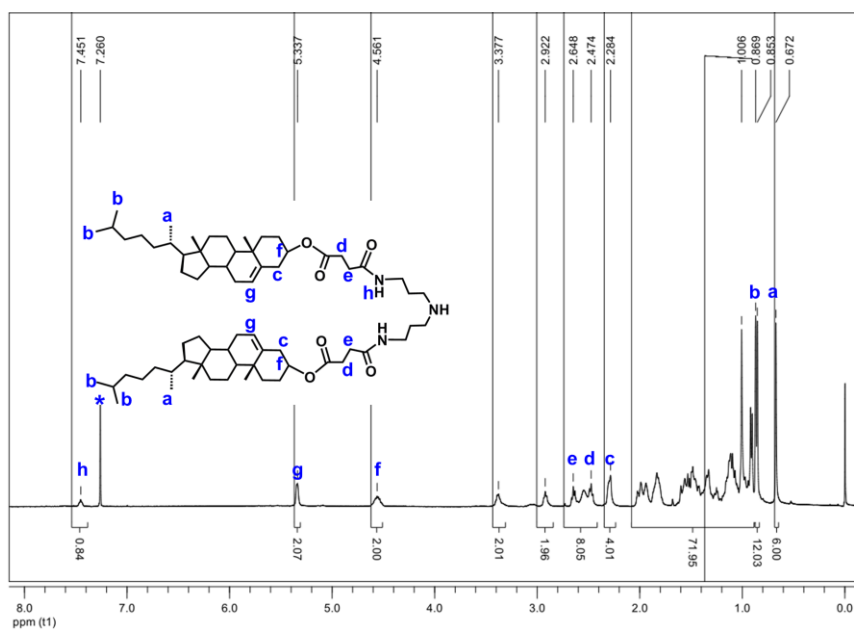

**Figure S6.**  $^1\text{H}$  NMR spectrum of compound 2 in  $\text{CDCl}_3$ .

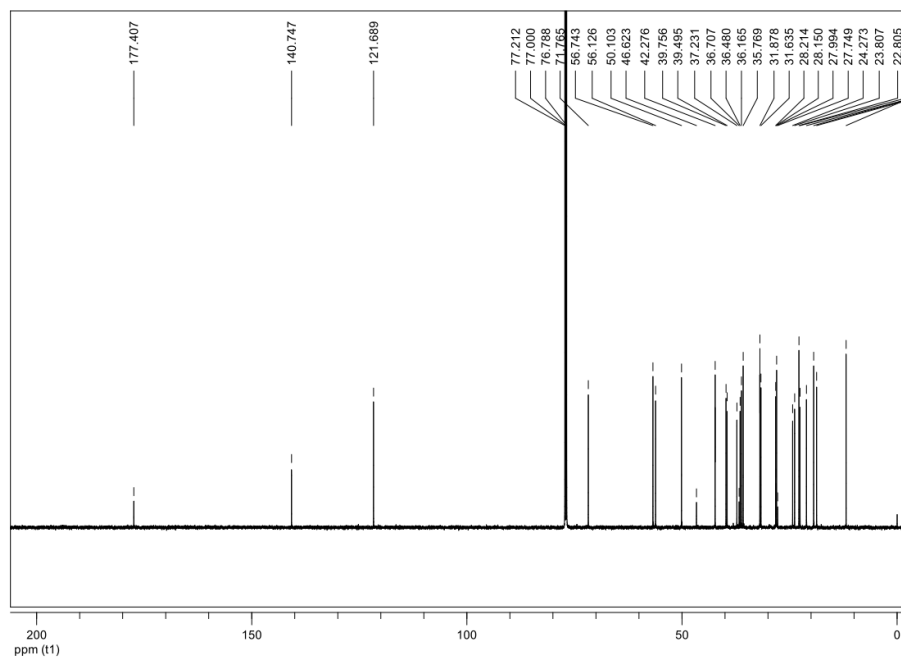

**Figure S7.**  $^{13}\text{C}$  NMR spectrum of compound 2 in  $\text{CDCl}_3$ .

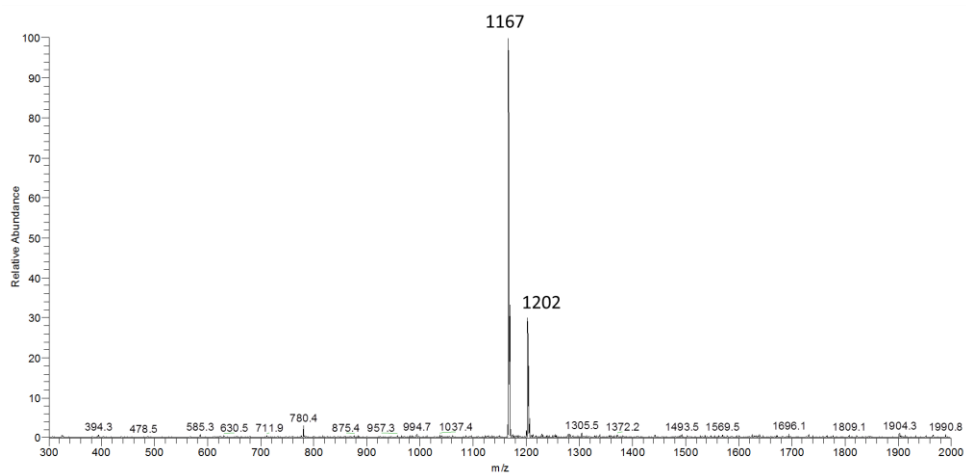

**Figure S8.** ESI-MS spectrum of compound 3.  $[\text{M}-\text{H}]^-$ :  $1167 \text{ g mol}^{-1}$ ,  $[\text{M}+\text{Cl}]^-$ :  $1202 \text{ g mol}^{-1}$ .

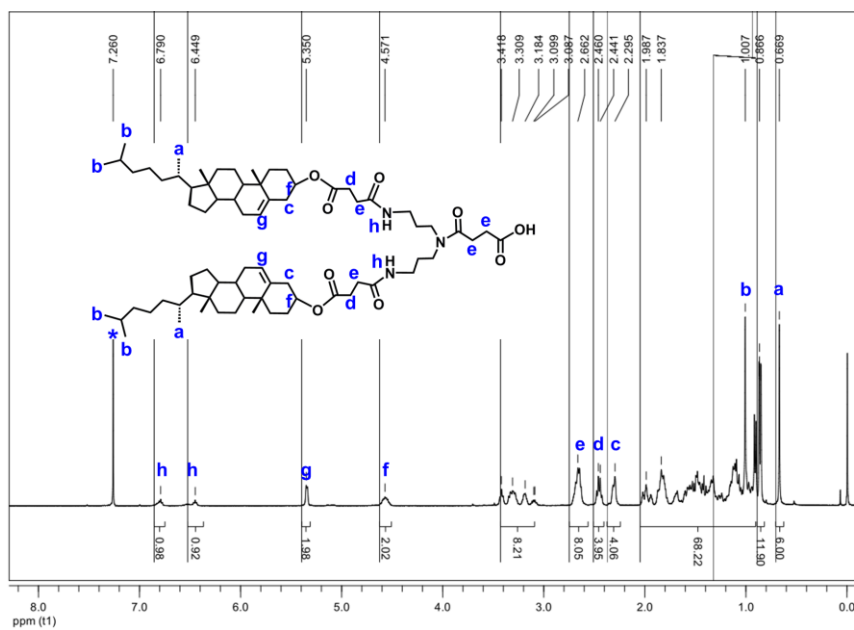

Figure S9. <sup>1</sup>H NMR spectrum of compound 3 in CDCl<sub>3</sub>.

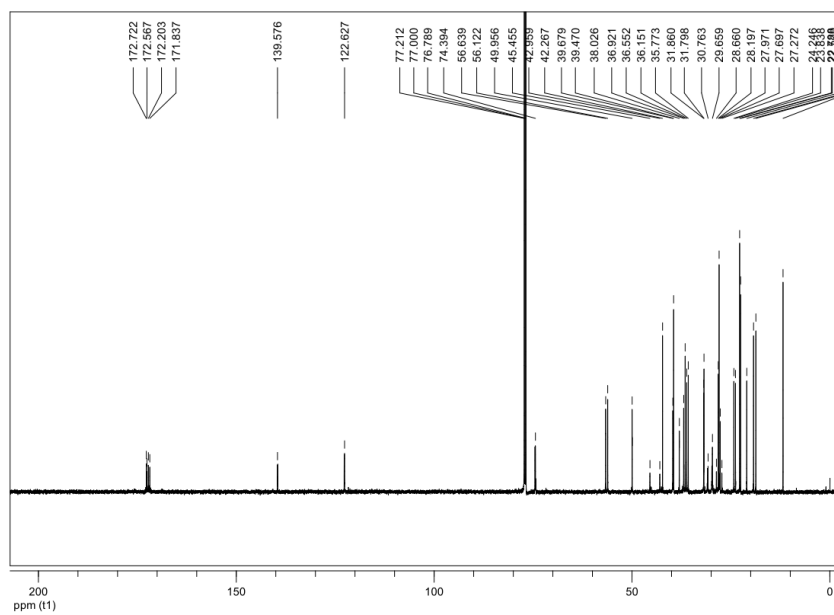

Figure S10. <sup>13</sup>C NMR spectrum of compound 3 in CDCl<sub>3</sub>.

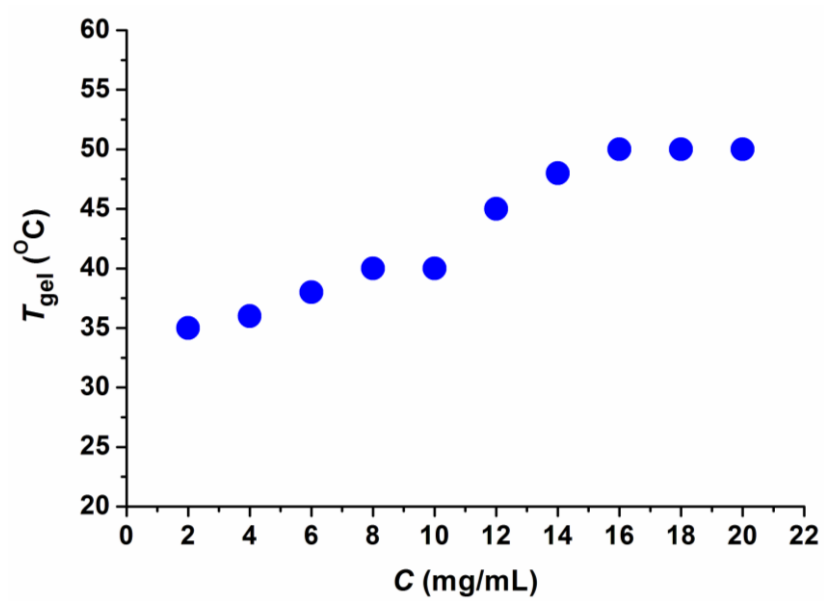

**Figure S11.** The sol-to-gel transition temperature ( $T_{gel}$ ) versus concentrations of compound 3 in toluene.
